# Supplementary material for: Inhibitory Efficacy of Main Components of Scutellaria baicalensis on the Interaction between Spike Protein of SARS-CoV-2 and Human Angiotensin-Converting Enzyme II
Source: MDPI journal article supplement (doi:10.3390/ijms25052935), 2024-03-02
Supplement: s1 [file s1]

**Table S1.** LC-MS analysis of constituents in *S. baicalensis*.

| Peak No. | Major Component                       | Retention Time (min) | Measured $m/z$ | Calculated $m/z$ | Molecular Formula                               | Intensity  | Percentage (%) |
|----------|---------------------------------------|----------------------|----------------|------------------|-------------------------------------------------|------------|----------------|
| 1        | Chrysin 6-C-arabinoside-8-C-glucoside | 2.5                  | 547.1323       | 547.1457         | C <sub>26</sub> H <sub>27</sub> O <sub>13</sub> | 4,919,767  | 13.1           |
| 2        | Chrysin 6-C-glucoside-8-C-arabinoside | 3.2                  | 547.1318       | 547.1457         | C <sub>26</sub> H <sub>27</sub> O <sub>13</sub> | 3,280,141  | 8.3            |
| 3        | Scutellarin                           | 3.5                  | 461.1123       | 461.0803         | C <sub>21</sub> H <sub>18</sub> O <sub>12</sub> | 315,107    | 2.1            |
| 4        | Quercetin                             | 5.4                  | 301.0262       | 301.0432         | C <sub>15</sub> H <sub>10</sub> O <sub>7</sub>  | 370,341    | 0.7            |
| 5        | Baicalin                              | 7.8                  | 445.0662       | 445.0776         | C <sub>21</sub> H <sub>17</sub> O <sub>11</sub> | 4,759,367  | 16.5           |
| 6        | Wogonoside                            | 8.0                  | 459.0819       | 459.0933         | C <sub>22</sub> H <sub>19</sub> O <sub>11</sub> | 3,733,587  | 6.9            |
| 7        | Oroxyloside                           | 8.2                  | 459.0818       | 459.1011         | C <sub>22</sub> H <sub>20</sub> O <sub>11</sub> | 4,646,815  | 10.1           |
| 8        | Rhamnocitrin                          | 8.9                  | 299.0475       | 299.0612         | C <sub>16</sub> H <sub>12</sub> O <sub>6</sub>  | 724,107    | 1.4            |
| 9        | Baicalein                             | 9.3                  | 269.0376       | 269.0455         | C <sub>15</sub> H <sub>9</sub> O <sub>5</sub>   | 14,651,640 | 34.2           |
| 10       | Oroxylin A                            | 10.3                 | 283.0528       | 283.0612         | C <sub>16</sub> H <sub>11</sub> O <sub>5</sub>  | 1,607,887  | 8.1            |

Note. "m" represents the mass and "z" represents the charge of the ion.  $m/z$  represents the mass divided by the charge number, known as the mass-to-charge ratio, and is used as the horizontal axis unit in the mass spectrum.
